# Supplementary material for: Facile synthesis of polypyrrole–rhodamine B nanoparticles for self-monitored photothermal therapy of cancer cells
Source: Royal Society of Chemistry journal article supplement (doi:10.1039/c9tb02274k), 2019-12-20
Supplement: c9tb02274k1.pdf [file c9tb02274k1.pdf]

Supporting Information

**Facile synthesis of polypyrrole-rhodamine B nanoparticles for self-monitored photothermal therapy of cancer cells**

Xiao-Hui Wang,<sup>\*a</sup> Xue-Qiao Chen,<sup>a</sup> Hong-Shang Peng,<sup>b</sup> Xiao-Fei Wei,<sup>a</sup> Xiao-Juan Wang,<sup>a</sup> Kun Cheng,<sup>a</sup> Yuan-An Liu<sup>a</sup> and Wei Yang <sup>\*a</sup>

<sup>a</sup> Beijing Key Laboratory of Work Safety Intelligent Monitoring, School of Electronic Engineering, Beijing University of Posts and Telecommunications, Haidian District, Beijing, 100876, China  
Email: wangxiaohui@bupt.edu.cn

<sup>b</sup> School of Science, Minzu University of China, Beijing, 100081, China

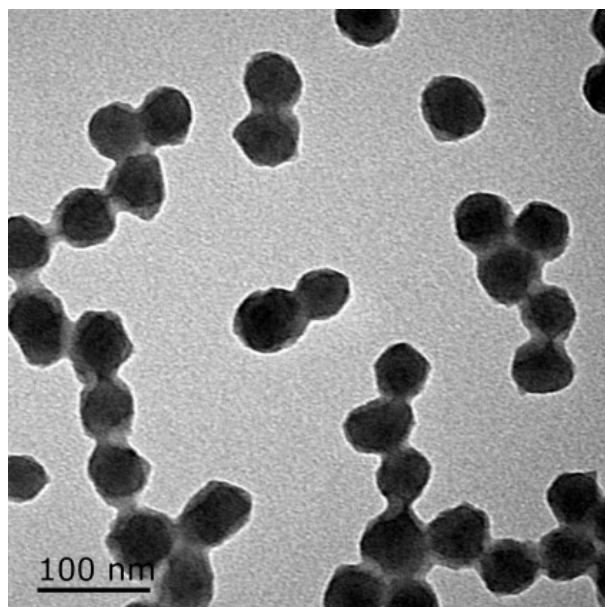

Fig. S1 TEM images of PPy nanoparticles without rhodamine B.

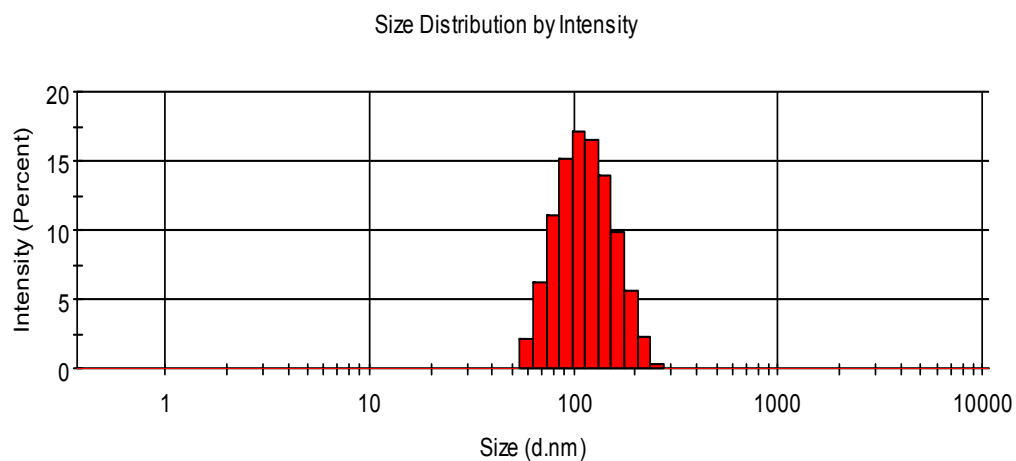

Fig. S2 The particle size of PPy-RB NPs measured by dynamic light scattering.

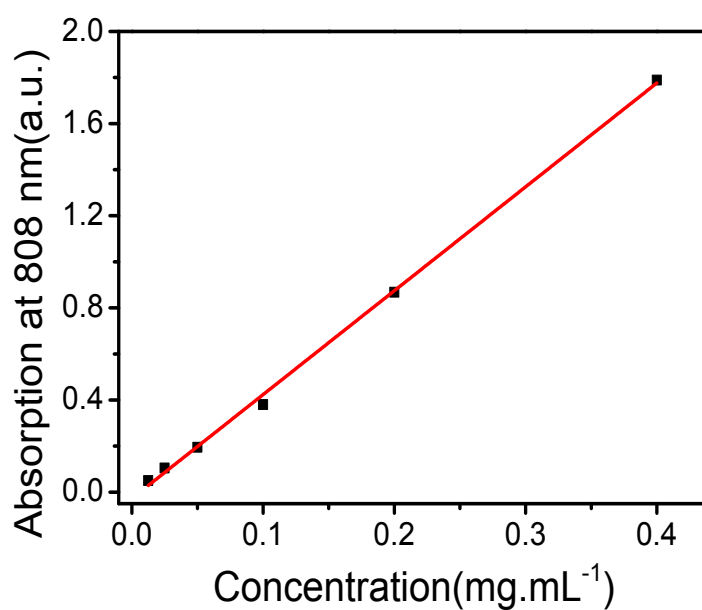

Fig. S3 Linear fitting curve of the absorption intensity of PPy-RB NPs solution at 808 nm versus the sample concentrations.

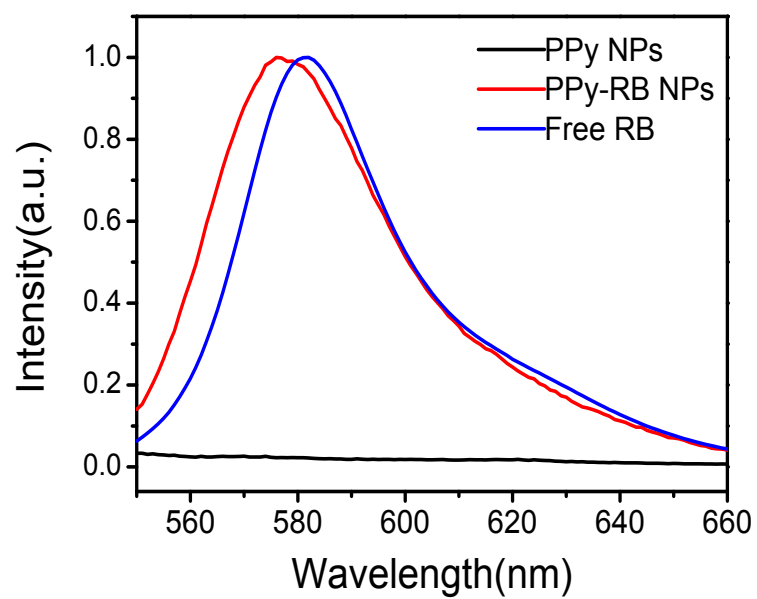

Fig. S4 Fluorescence emission spectra of rhodamine B, PPy NPs and PPy-RB NPs aqueous dispersion under 530 nm excitation, respectively.

A

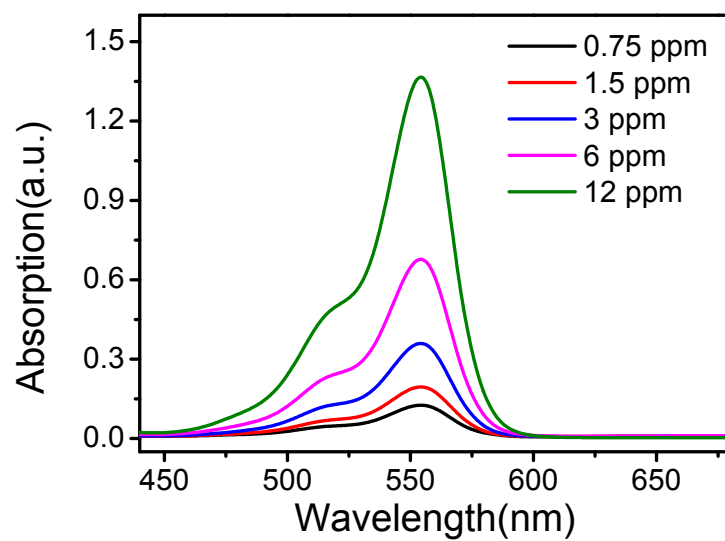

B

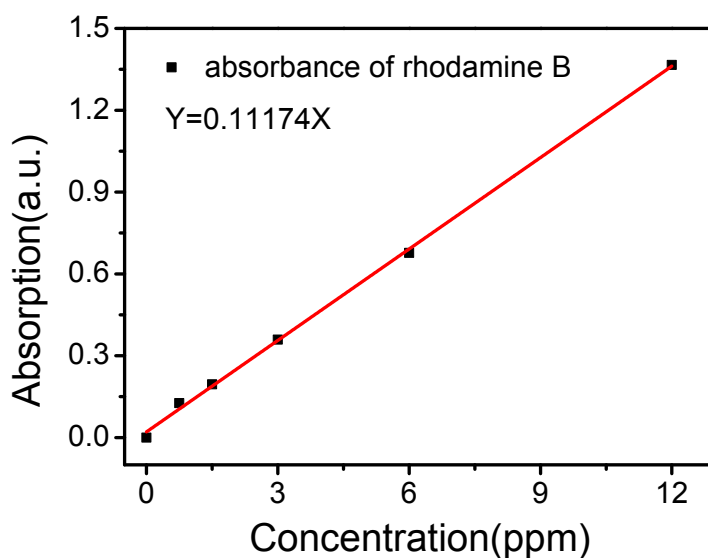

C

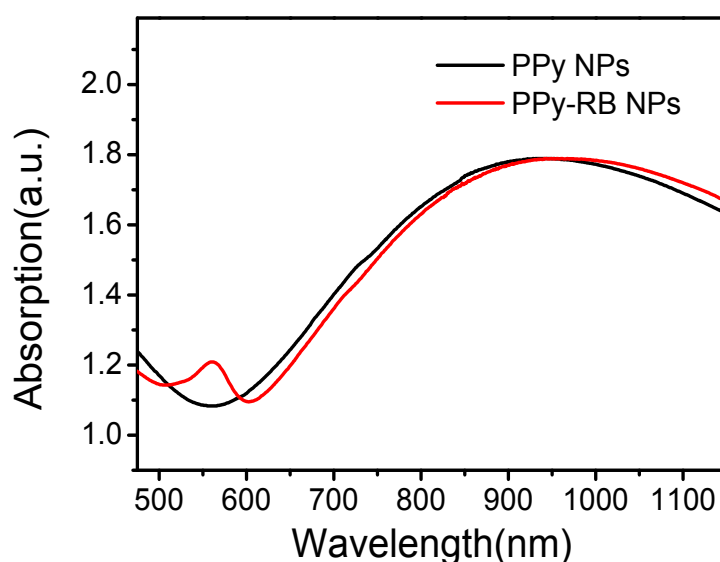

Fig. S5. (A) Absorption spectra of rhodamine B at various concentrations. (B) Absorption peak intensity of rhodamine B in Fig.S5A is plotted against the concentrations, which fits to the line  $Y=0.11174X$  with  $R^2=0.9988$  (Y represents the absorbance peak intensity, X represents the rhodamine B concentration). (C) The absorption spectra of PPy-RB NPs ( $0.4 \text{ mg}\cdot\text{mL}^{-1}$ ) and PPy NPs. In this experiment, Y is calculated as  $1.209-1.08365=0.12535$ ,  $X = 1.1218 \text{ ppm}$ . The loading efficiency of rhodamine B on PPy-RB NPs is calculated as  $1.1218 \times 10^{-6}/(0.4 \times 10^{-3}) \approx 0.3\%$ .

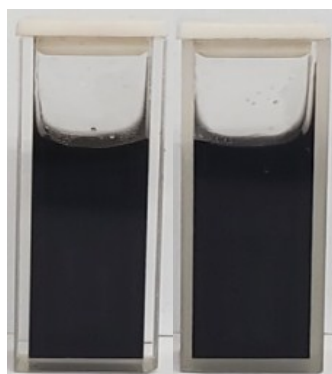

Fig. S6 Photographs of the PPy-RB NPs ( $0.1 \text{ mg}\cdot\text{mL}^{-1}$ ) dispersed in PBS (left) before and (right) after stored for one week.

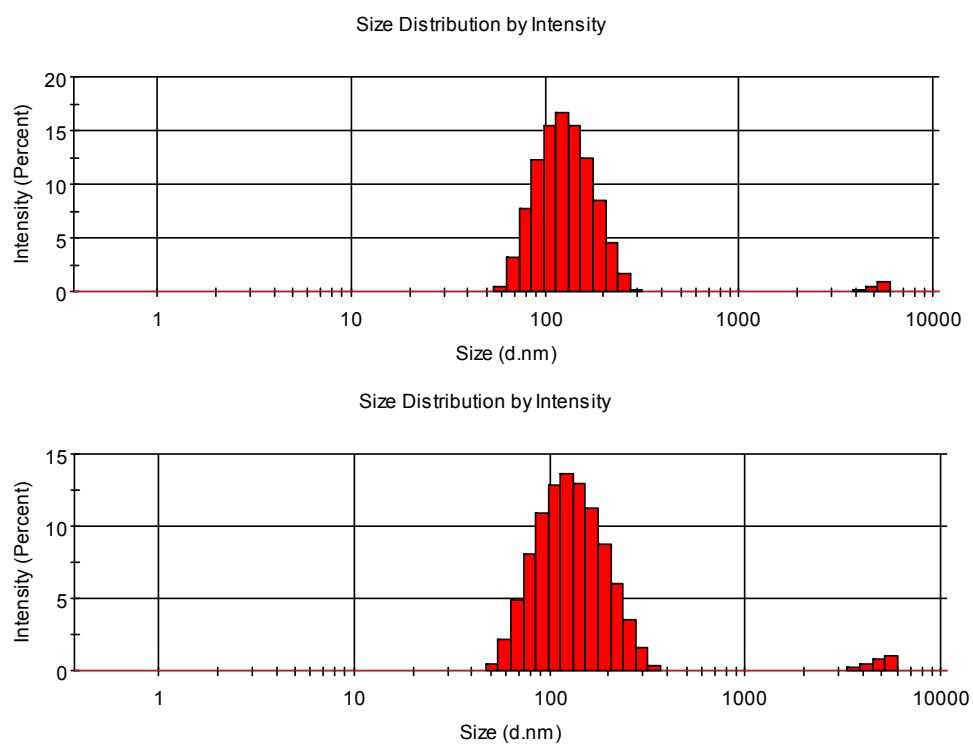

Fig. S7 Particle size of PPy-RB NPs dispersed in PBS (upper) before and (lower) after one week by dynamic light scattering analysis.

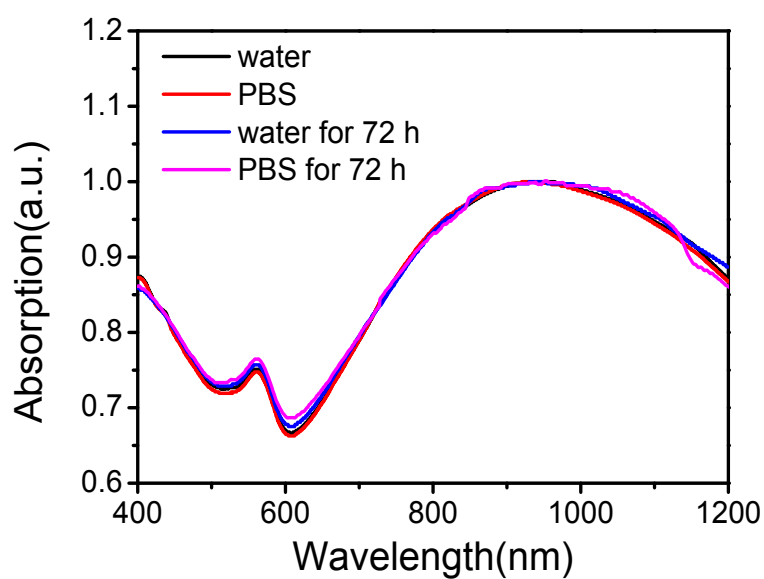

Fig. S8 The absorption spectra of the PPy-RB NPs dispersed in water and PBS before and after stored for 72 h.

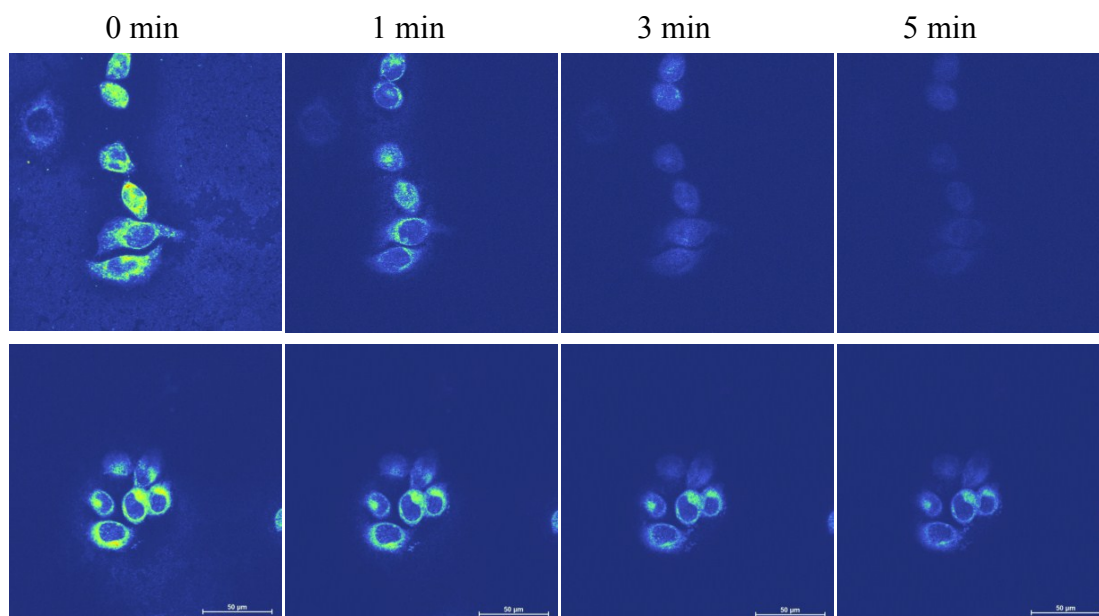

Fig. S9 Pseudocolor luminescence intensity images of HepG2 cells incubated with PPy-RB NPs irradiated by 808 nm (upper) and 405 nm (lower) lasers for different times (from 0 to 5 min).
